# Supplementary material
Source: publisher figshare collection journal article supplement (https://sage.figshare.com/ndownloader/files/18169802)
Supplement: Supplementary file 1 [file 18169802]

Veterinary Pathology: Supplemental Materials.  
Mignacca et al. *Cistus salviifolius* toxicity in cattle.

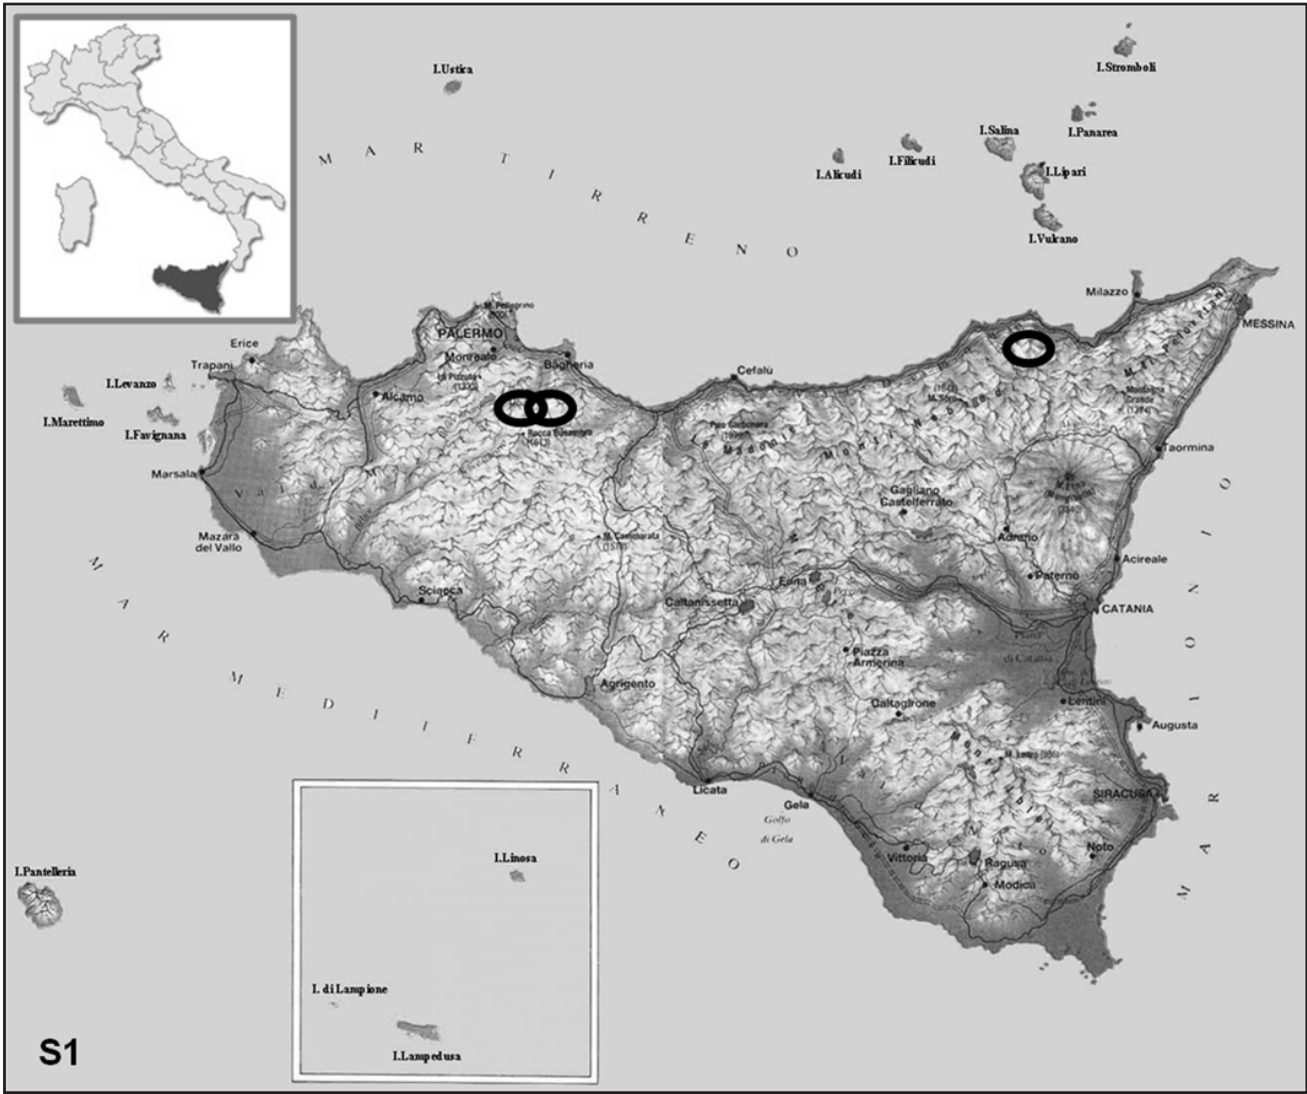

**Supplemental Figure S1.** Geographical areas where the three herds(black circles) are located (North of Sicily, insular region of southern Italy).

Supplemental Table S1: Blood sampling and pathological exams performed.

|                    |        | Group 1 | Group 2 | Group 3 | Healthy animals |
|--------------------|--------|---------|---------|---------|-----------------|
| Blood samples      | Farm A | 0       | 3       | 3       | 2               |
|                    | Farm B | 3       | 3       | 2       | 2               |
|                    | Farm C | 0       | 2       | 1       | 2               |
| Pathological exams | Farm A | 0       | 1       | 0       |                 |
|                    | Farm B | 0       | 2       | 0       |                 |
